# Supplementary material for: Seeded growth of high-quality transition metal dichalcogenide single crystals via chemical vapor transport
Source: Royal Society of Chemistry journal article supplement (doi:10.1039/d0ce01295e), 2020-01-01
Supplement: d0ce01295e1.pdf [file d0ce01295e1.pdf]

## Supplementary Information

### Seeded growth of high-quality transition metal dichalcogenide single crystals via chemical vapor transport

Hao Li,<sup>ab</sup> Junku Liu,<sup>c</sup> Nan Guo,<sup>c</sup> Lin Xiao,<sup>c</sup> Haoxiong Zhang,<sup>d</sup> Shuyun Zhou,<sup>df</sup> Yang Wu<sup>\*be</sup> and Shoushan Fan<sup>bd</sup>

<sup>a</sup> School of Materials Science and Engineering, Tsinghua University, Beijing, 100084, P. R. China

<sup>b</sup> Tsinghua-Foxconn Nanotechnology Research Center, Tsinghua University, Beijing, 100084, P. R. China

<sup>c</sup> Qian Xuesen Laboratory of Space Technology, China Academy of Space Technology, Beijing 100094, P. R. China

<sup>d</sup> State Key Laboratory of Low Dimensional Quantum Physics and Department of Physics, Tsinghua University, Beijing 100084, P. R. China

<sup>e</sup> Department of Mechanical Engineering, Tsinghua University, Beijing, 100084, P. R. China. E-mail: wuyangthu@tsinghua.edu.cn

<sup>f</sup> Frontier Science Center for Quantum Information, Beijing 100084, China

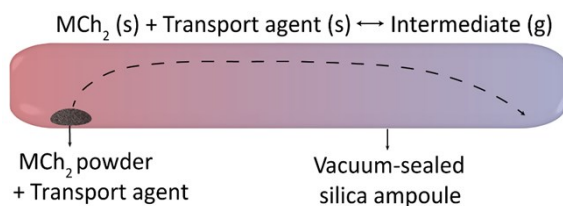

**Scheme S1** Schematic diagram of the C-CVT growth setup.

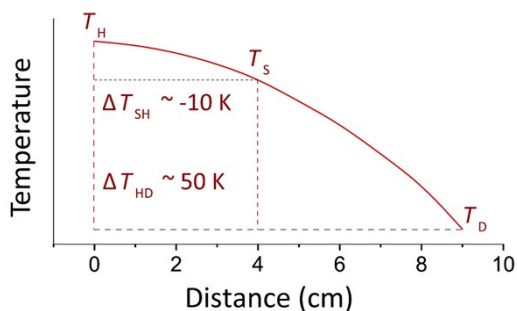

**Fig. S1** The temperature gradient in the horizontal tube furnace.  $T_H$ : temperature of the hot end,  $T_D$ : temperature of the deposition end,  $T_S$ : temperature of source material.

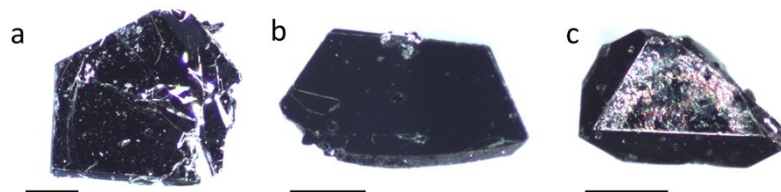

**Fig. S2** Optical images of (a) MoSe<sub>2</sub>, (b) MoTe<sub>2</sub>, (c) PtSe<sub>2</sub> seed crystals, which are selected from samples grown via C-CVT and cut off into regular shape. The scale bars are 200 μm.

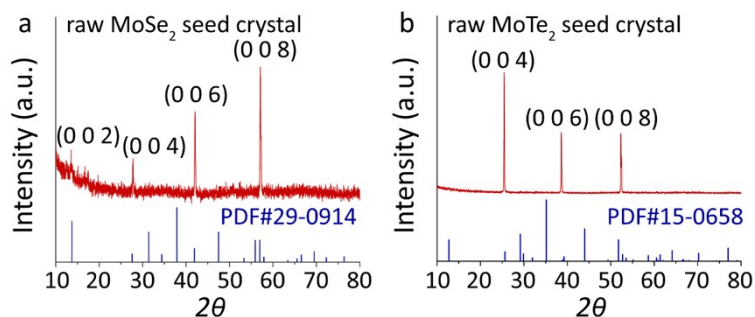

**Fig. S3** PXRD patterns of (a) MoSe<sub>2</sub>, (b) MoTe<sub>2</sub> raw seed crystals, which are selected from samples grown via C-CVT and cut into regular shapes, showing preferred orientation along the [0 0 1] direction.

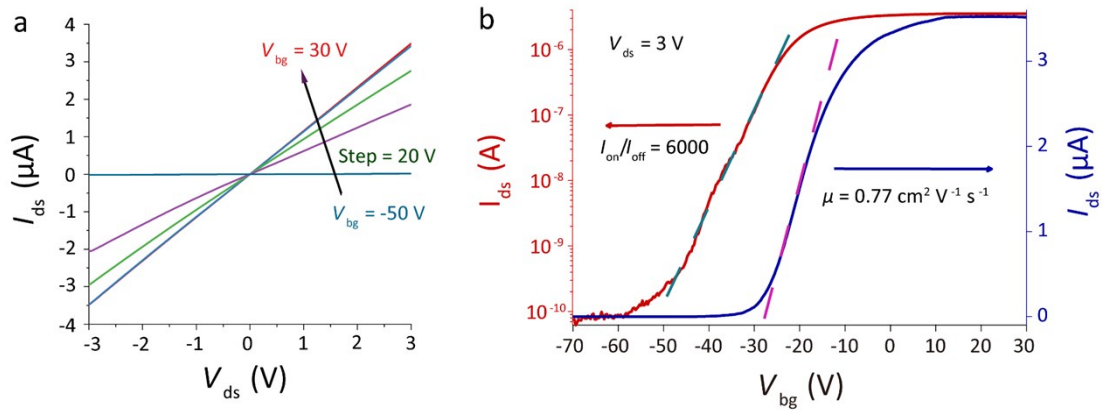

**Fig. S4** Electronic properties of the back-gated multi-layered MoSe<sub>2</sub> phototransistor based on the mechanical exfoliation of MoSe<sub>2</sub> crystal grown via S-CVT. (a) Output characteristics and (b) transfer characteristics.

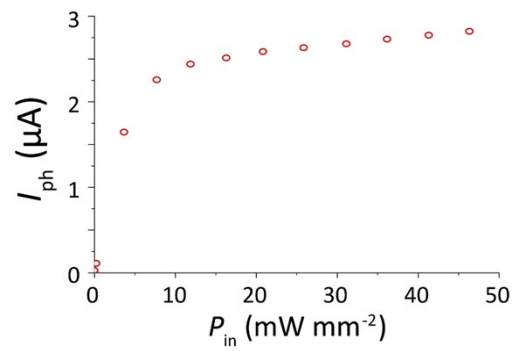

**Fig. S5** Photocurrents of the back-gated multi-layered MoSe<sub>2</sub> phototransistor as a function of light power intensity ( $P_{in}$ ) at  $V_{ds} = 2.5\text{ V}$  and  $V_{bg} = -50\text{ V}$  under 637-nm illumination.
